# Supplementary material
Source: publisher figshare collection journal article supplement (https://sage.figshare.com/ndownloader/files/17636525)
Supplement: Supplementary file 1 [file 17636525]

### Supplementary Material 3- Supporting Quotes

| Theme Category                                                                                                 | Supporting Quotes                                                                                                                                                                                                                                                                                                                                                                                                                                                                                                                                                                                                                                                                                                                                 |
|----------------------------------------------------------------------------------------------------------------|---------------------------------------------------------------------------------------------------------------------------------------------------------------------------------------------------------------------------------------------------------------------------------------------------------------------------------------------------------------------------------------------------------------------------------------------------------------------------------------------------------------------------------------------------------------------------------------------------------------------------------------------------------------------------------------------------------------------------------------------------|
| <b>Perceptions of the healthcare system and healthcare providers in England versus their country of origin</b> | <ul style="list-style-type: none"> <li>“...until we really got sick we didn't register with GP.” (PC1, 34, Latvian)</li> <li>“..I came to the UK equipped with a massive box of drugs for all possible outcomes..” (PH1, 35, Lithuanian)</li> <li>““Here it’s different, if you go to GP and you ask about something they always send you to the nurse, that’s why a lot of people say, “I will leave it and when I go to Poland I will check it out.”” (PH3, 30, Polish)</li> </ul>                                                                                                                                                                                                                                                              |
| <b>Knowledge and understanding of cervical screening, cervical cancer and HPV</b>                              | <ul style="list-style-type: none"> <li>“As long as you’re sexually active you can get it at any time in your life, either if you are 16 or 30 or 50.” (PC7, 30, Romanian)</li> <li>“Yeah, I’ve always believed it was hereditary, but then no one else in my family has ever had abnormal smear tests, so maybe it’s not, but that’s what I always thought.” (PH11, 45, English)</li> </ul>                                                                                                                                                                                                                                                                                                                                                       |
| <b>Cervical screening behaviours</b>                                                                           | <ul style="list-style-type: none"> <li>“...that all tests or... or something should be early yeah, so that should start at eighteen years.” (PH6, 26, Polish)</li> <li>“Because the previous one showed some irregular cells, this one was absolutely fine, normal, so I felt that there is a discrepancy, so just to be on the safe side I would double check with a gynaecologist.” (PC4, 43, Hungarian)</li> <li>“I’m not very sure if the cervical cancer is kind of an aggressive cancer, how fast it actually develops. And if this gap is actually short enough gap to detect it early.” (PC24, 33, Polish)</li> <li>No, just because having it yearly it would have a massive...Expensive for NHS, yeah.” (PC4, 43, Hungarian)</li> </ul> |

|                   |                                                                                                                                                                                                                                                                                                                                                                                                                                                                                                                                                                                                                                                                                                                                                                                                                                                                                                                                                                                                                                                                                                                                                                                                                |
|-------------------|----------------------------------------------------------------------------------------------------------------------------------------------------------------------------------------------------------------------------------------------------------------------------------------------------------------------------------------------------------------------------------------------------------------------------------------------------------------------------------------------------------------------------------------------------------------------------------------------------------------------------------------------------------------------------------------------------------------------------------------------------------------------------------------------------------------------------------------------------------------------------------------------------------------------------------------------------------------------------------------------------------------------------------------------------------------------------------------------------------------------------------------------------------------------------------------------------------------|
| <b>Motivators</b> | <ul style="list-style-type: none"> <li>• “So that’s what always done me, I think the word cancer scares you.” (PH9, 52, English)</li> <li>• “It’s important for my kids, just because of my kids, that’s the most important part because I don’t want them to stay without somebody.” (PH12, 30, Latvian)</li> <li>• “..but as I said I probably was brought up the way that if something comes from the doctor it’s important, so that was my... I didn’t think twice to go or not to go.” (P14, 36, Lithuanian)</li> </ul>                                                                                                                                                                                                                                                                                                                                                                                                                                                                                                                                                                                                                                                                                   |
| <b>Barriers</b>   | <ul style="list-style-type: none"> <li>• “Do you see what I mean, there’s obviously nothing wrong. It’s like going to the dentist, a lot of people don’t go until they have an issue.” (PC22, 31, English)</li> <li>• “I don’t have a reason why I didn’t go for the smear test first ...” (PH12, 30, Latvian)</li> <li>• “I’m not sure why I didn’t go for the first one to be honest. I was young and I kind of disregarded it I guess.” (PC20, 31, English)</li> <li>• “..extremely busy life, I was juggling with both PhD and going through some personal difficulties, so I just completely ignored it.” (PH1, 35, Lithuanian)</li> <li>• “...but at that moment I set my priority more for the kids and other things that I needed to do, just because we moved, I needed to change the kids schools..” (PH12, 30 Latvian)</li> <li>• “Well, I think you have to call them and book an appointment, and the phone call is sometimes a big barrier because people on the other side of the line don’t understand what you’re saying, and you don’t understand them.” (FG, Czech/Slovak)</li> <li>• “So it’s about the treatment I need I would most probably want to hear it obviously from a</li> </ul> |

|                                                    |                                                                                                                                                                                                                                                                                                                                                                                                                                                                                                                                                                                                                                                                                                                                                                                                                                                                                                                            |
|----------------------------------------------------|----------------------------------------------------------------------------------------------------------------------------------------------------------------------------------------------------------------------------------------------------------------------------------------------------------------------------------------------------------------------------------------------------------------------------------------------------------------------------------------------------------------------------------------------------------------------------------------------------------------------------------------------------------------------------------------------------------------------------------------------------------------------------------------------------------------------------------------------------------------------------------------------------------------------------|
|                                                    | doctor ...” (PH14, 36, Lithuanian)                                                                                                                                                                                                                                                                                                                                                                                                                                                                                                                                                                                                                                                                                                                                                                                                                                                                                         |
| <b>Increasing uptake of screening in nEE women</b> | <ul style="list-style-type: none"> <li>• “...on public transport you do get quite a lot of, not a lot, but you do get these adverts for STD checks and everything for young people, so maybe go the same route..” (PC23, 33, Czech)</li> <li>• “If you don’t give them the choice, because as I say what differs the UK from many other countries, in those countries people are raised with no choice, you’re always told and you know exactly what you’re expected to do from early childhood, so nobody like it, medical procedures, but to say you have to do it, they do it..” (UHL PH1, 35, Lithuanian)</li> <li>• If that people to keep me just in house, never take me out for see, for learn, for nothing.....if I take you with me, in Hungary or Romania, I keep you just in house, the people don’t know who is there, how can somebody help you if they don’t see you never? (PH4, 34, Hungarian)</li> </ul> |

Details in the parentheses following the quotes represent the participant's identification number and recruitment setting (PC= Community, PH=Colposcopy clinic), and age (in years).
